# Supplementary material for: Fabrication and Evaluation of Filtration Membranes from Industrial Polymer Waste
Source: MDPI journal article supplement (doi:10.3390/membranes13040445), 2023-04-19
Supplement: s1 [file s1]

## Supplementary Information (SI)

# Fabrication and evaluation of filtration membranes from industrial polymer waste

Saleheen Bano<sup>1,2</sup>, Mukesh Pednekar<sup>2,3,4</sup>, Saranya Rameshkumar<sup>1,2</sup>, Dipu Borah<sup>1,2</sup>, Michael A. Morris<sup>1,2,\*</sup>, Ramesh Babu Padamati<sup>1,2,3,\*</sup> and Niamh Cronly<sup>1</sup>

<sup>1</sup> School of Chemistry, CRANN, Trinity College Dublin, Dublin 2, Ireland.

<sup>2</sup> AMBER, SFI Research Centre for Advanced Materials and BioEngineering Research, Ireland

<sup>3</sup> School of Physics, CRANN, Trinity College Dublin, Dublin 2, Ireland

<sup>4</sup> Dairy Processing Technology Centre (DPTC), Ireland

\* Correspondence: [babup@tcd.ie](mailto:babup@tcd.ie) (R.B.) ; [morris2@tcd.ie](mailto:morris2@tcd.ie) (M.A.M)

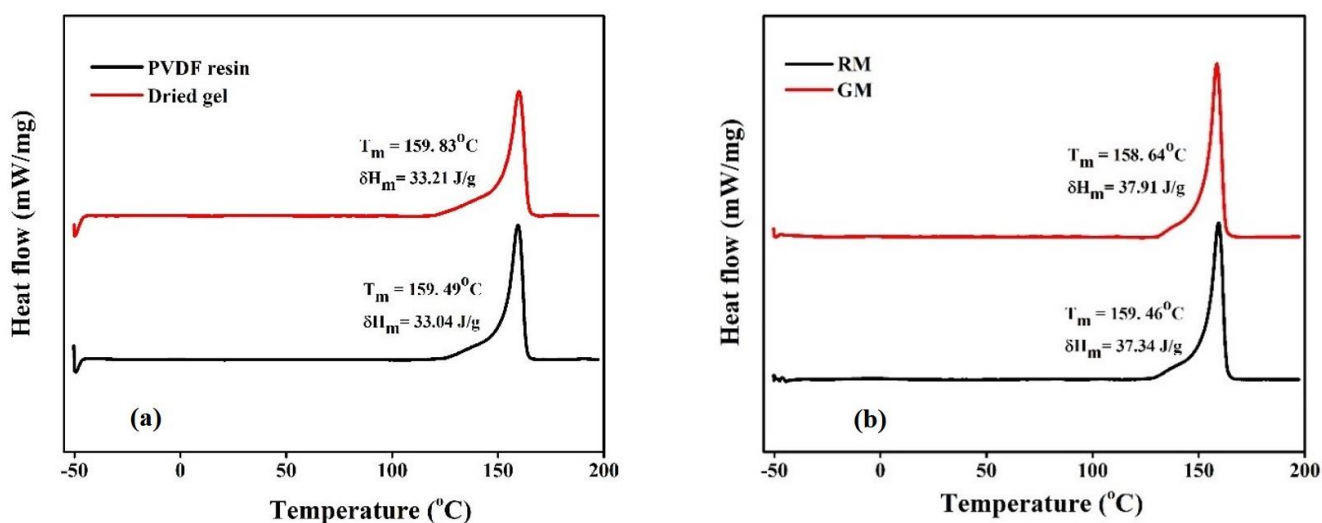

**Figure S1.** DSC scans of (a) gel powder and PVDF resin, (b) gel membrane (GM) and resin membrane (RM)

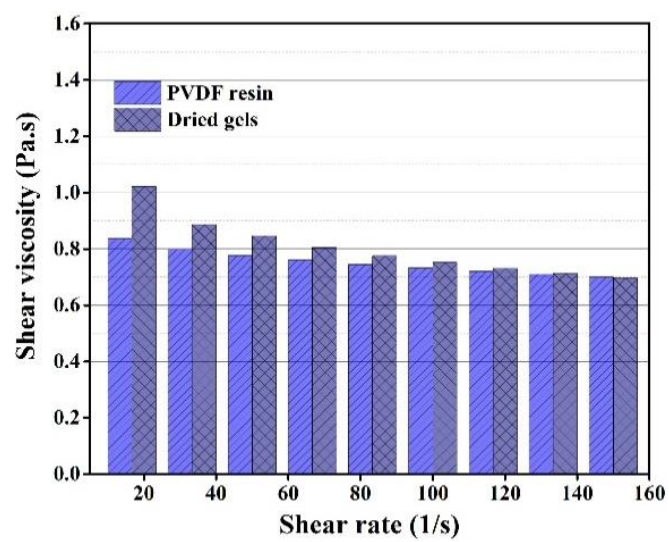

**Figure S2.** Shear viscosity data for dried gel powders and PVDF resins

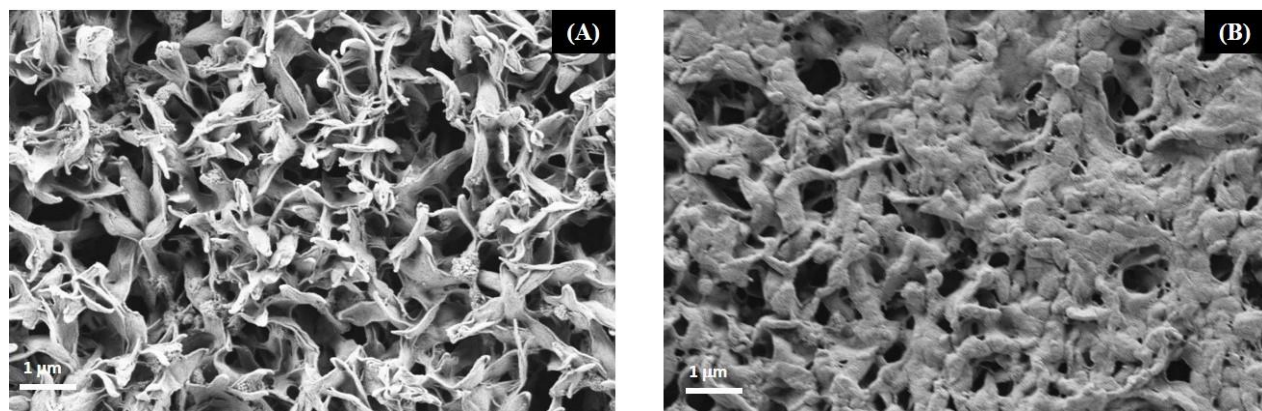

**Figure S3.** Surface morphology of (A) Fresh GM membrane and (B) fouled membrane after cleaning at the end of 2nd cycle of cross-flow filtration.

**Table S1. Comparison of relevant data of the present study with previously reported data for PVDF based membranes prepared via phase inversion**

| Membrane                      | Solvent type  | Pore size (μm) | Porosity (%) | PWP (L/m <sup>2</sup> .h) | Retention (%)     | Potential Application | Ref.                 |
|-------------------------------|---------------|----------------|--------------|---------------------------|-------------------|-----------------------|----------------------|
| <b>PVDF- GM</b>               | Acetone       | 0.19           | 66.7         | 478                       | 26.8 <sup>a</sup> | MF                    | <i>Present study</i> |
| <b>PVDF *</b>                 | DMA / acetone | 0.25           | 35           | 430                       | -                 | UF                    | (13)                 |
| <b>PVDF*</b>                  | TEP           | 0.26           | -            | 1860                      | 12 <sup>a</sup>   | MF-UF                 | (44)                 |
|                               |               | 0.11           |              | 120                       | 97 <sup>a</sup>   |                       |                      |
| <b>PVDF **</b>                | TEP           | 0.14           | 86.5         | 290                       | -                 | UF- MF                | (46)                 |
|                               |               | 0.17           |              | 1100                      |                   |                       |                      |
| <b>PVDF **</b>                | DMF           | -              | 32.2         | 99.6                      | -                 | MF                    | (56)                 |
|                               | DMAc          |                | 33.7         | 87.7                      |                   |                       |                      |
|                               | DMAc/TEP      |                | 44.2         | 89.6                      |                   |                       |                      |
|                               | DMF/ TEP      |                | 8.2          | 35.2                      |                   |                       |                      |
| <b>PVDF **</b>                | DCAC          |                | 78.7         | 258                       | 18.4 <sup>a</sup> | MBR                   | (41)                 |
| <b>PVDF / 0.5GO-APTS</b>      | DMF           | 0.26           | 57.2         | 6.2                       | 99.9 <sup>b</sup> | AGDM                  | (48)                 |
| <b>PVDF / 0.005 nano-ZnO</b>  | DMAc          | 0.08           | 75.1         | 452.1                     | 29 <sup>a</sup>   | MF                    | (52)                 |
| <b>PVDF (GVWP, Millipore)</b> | -             | 0.22           | -            | 655                       | -                 | MF                    | (57)                 |

\* Neat membrane without pore former; \*\* Neat membrane with pore former; a with respect to BSA; b with respect to mineral salt
